# Supplementary material for: A first calibration of the JULES-crop version 7.4 for rice using the novel O 3 -FACE experiment in China
Source: Copernicus journal article supplement (doi:10.5194/egusphere-2024-4077), 2025-03-12
Supplement: Supplementary file 1 [file egusphere-2024-4077-supplement.pdf]

**Supplemental table 1 The description of experiments providing the temperature response of photosynthesis rate.**

| Exp. | Cultivar   | Light intensity<br>( $\mu\text{mol m}^{-2} \text{s}^{-1}$ ) | CO <sub>2</sub> concentration<br>( $\mu\text{mol mol}^{-1}$ ) | Nitrogen<br>use | Stage                               | References                 |
|------|------------|-------------------------------------------------------------|---------------------------------------------------------------|-----------------|-------------------------------------|----------------------------|
| 1    | Amaroo     | 1500                                                        | 400                                                           | High            | Tillering                           | Huang et al.<br>(2021)     |
| 2    | Shanyou 63 |                                                             |                                                               |                 |                                     |                            |
| 3    | Yannong 19 | 1500                                                        | 400                                                           | High            | Tillering                           | Yang et al.<br>(2020)      |
| 4    | Notohikari | 1500                                                        | 380                                                           | Low             | NA                                  | Yamori et al.<br>(2011)    |
| 5    |            |                                                             |                                                               | Medium          | NA                                  |                            |
| 6    |            |                                                             |                                                               | High            | NA                                  |                            |
| 7    | Notohikari | 1500                                                        | 283                                                           | NA              | 21~ 63 days<br>after<br>germination | Nagai and<br>Makino (2009) |

1. NA means that the relevant setting was not mentioned in the study.

## References

- Huang, G., Yang, Y., Zhu, L., Peng, S., and Li, Y.: Temperature responses of photosynthesis and stomatal conductance in rice and wheat plants, *Agric. For. Meteorol.*, 300, 108322, <https://doi.org/10.1016/j.agrformet.2021.108322>, 2021.
- Nagai, T. and Makino, A.: Differences Between Rice and Wheat in Temperature Responses of Photosynthesis and Plant Growth, *Plant and Cell Physiology*, 50, 744-755, 10.1093/pcp/pcp029, 2009.
- Yamori, W., Nagai, T., and Makino, A.: The rate-limiting step for CO<sub>2</sub> assimilation at different temperatures is influenced by the leaf nitrogen content in several C<sub>3</sub> crop species, *Plant, Cell & Environment*, 34, 764-777, <https://doi.org/10.1111/j.1365-3040.2011.02280.x>, 2011.
- Yang, Y., Zhang, Q., Huang, G., Peng, S., and Li, Y.: Temperature responses of photosynthesis and leaf hydraulic conductance in rice and wheat, *Plant, Cell & Environment*, 43, 1437-1451, <https://doi.org/10.1111/pce.13743>, 2020.
